# Supplementary material
Source: Springer Nature journal article supplement (https://www.springermedizin.de/resource/supplementary/12937_2007_175_MOESM4_ESM.pdf/25654554)
Supplement: MOESM4 [file 25654554]

Antral cross-sectional area (mm<sup>2</sup>)

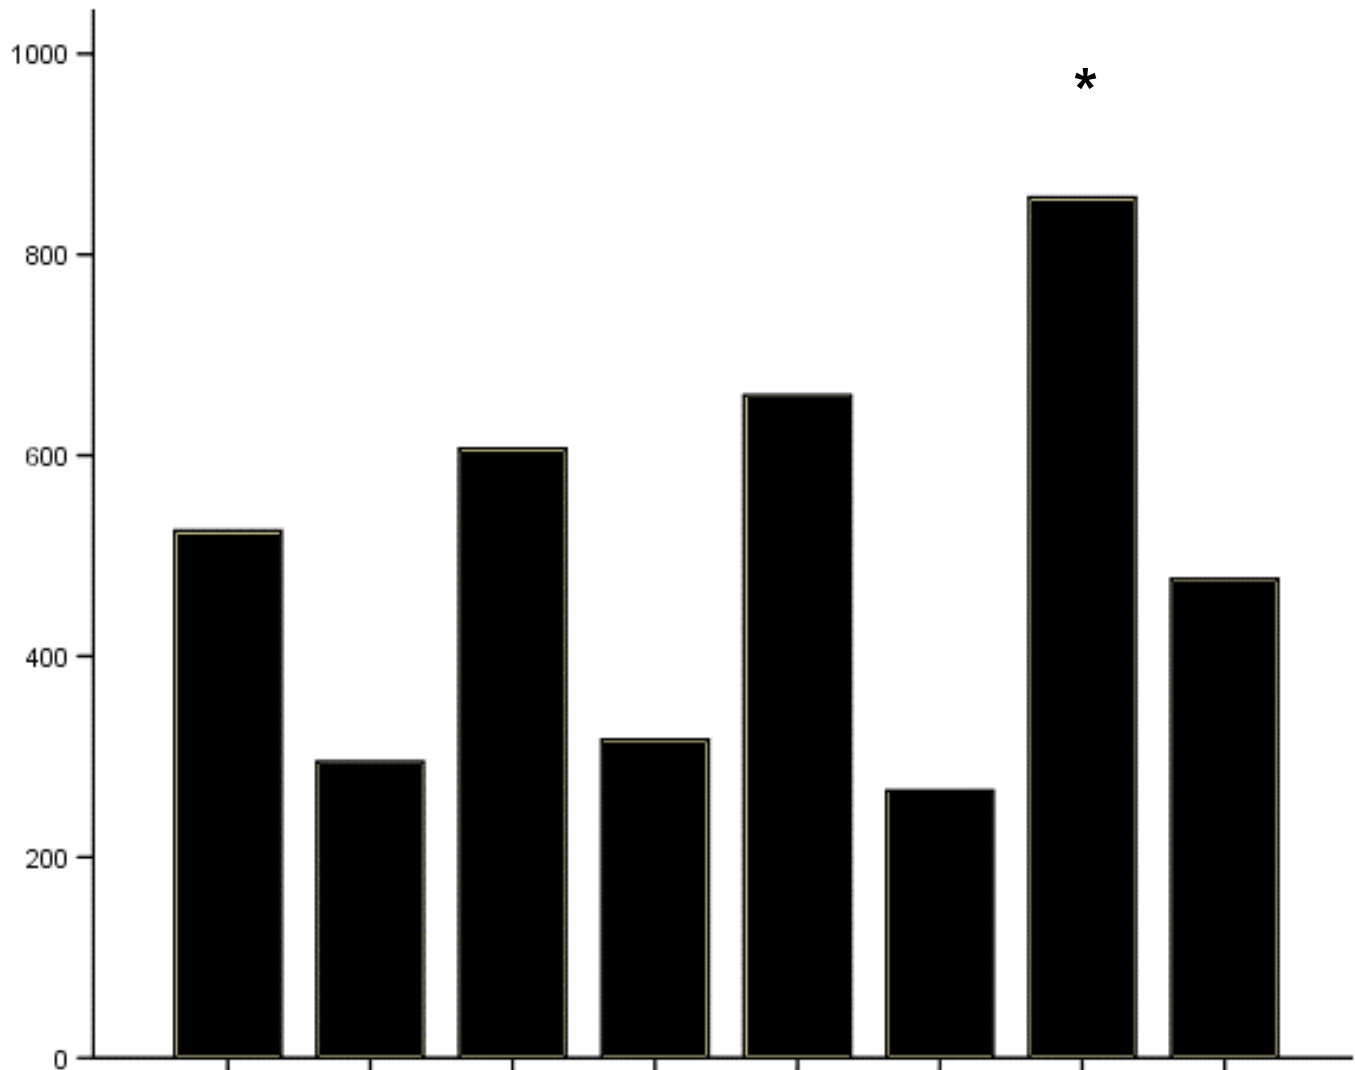

15 min 90 min 15 min 90 min 15 min 90 min 15 min 90 min

White wheat bread (Ref. meal) White wheat bread and vinegar Wholemeal wheat bread and vinegar Whole-kernel wheat bread and vinegar
